# Supplementary material for: The unseen invaders: introduced earthworms as drivers of change in plant communities in North American forests (a meta‐analysis)
Source: PubMed Central journal article supplement — Glob Chang Biol. 2016 Sep 3;23(3):1065–74. doi: 10.1111/gcb.13446 (PMC5324548; doi:10.1111/gcb.13446), 2016-09-03
Supplement: GCB-23-1065-s001.pdf [file GCB-23-1065-s001.pdf]

Supplementary Information  
**Appendix S1. PRISMA diagram**

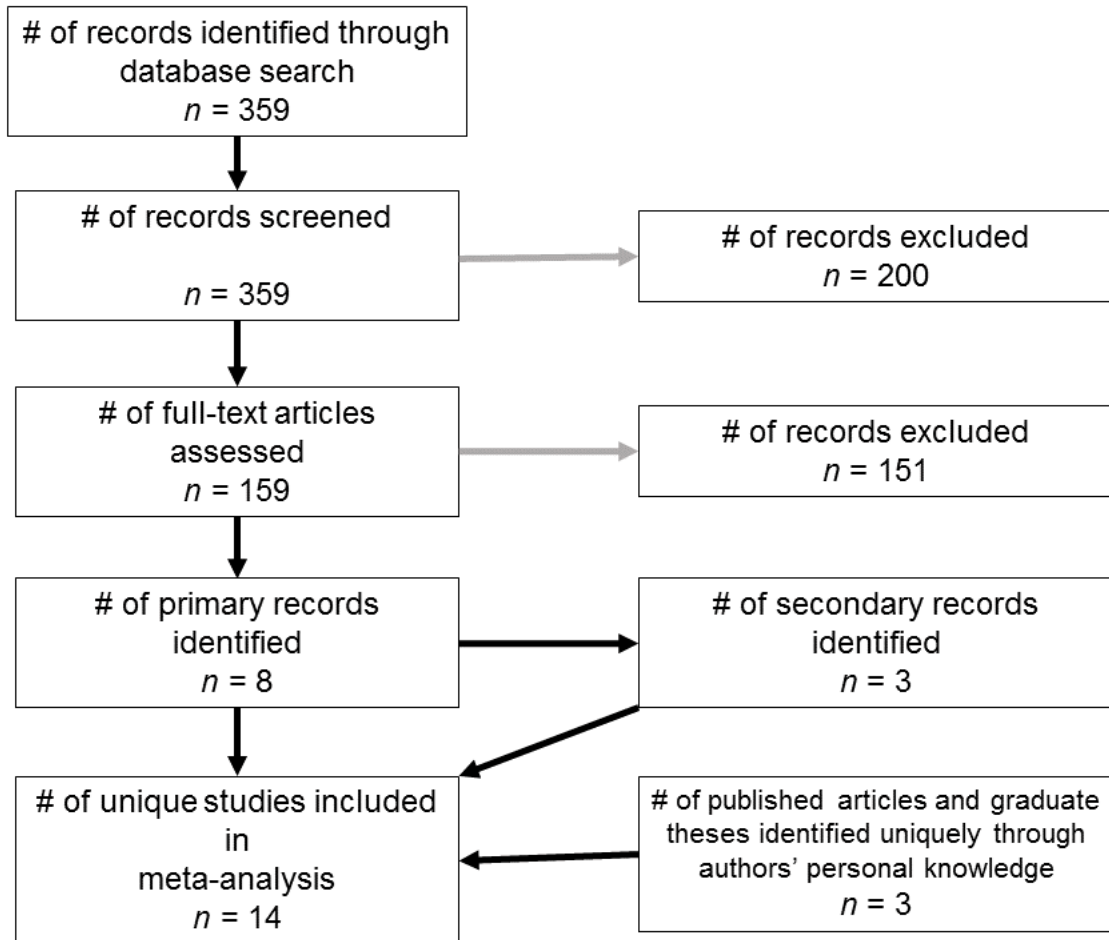

## Appendix S2. References of studies included in meta-analysis

1. Beauséjour, R., I. T. Handa, M. J. Lechowicz, B. Gilbert, and M. Vellend. 2014. Historical anthropogenic disturbances influence patterns of non-native earthworm and plant invasions in a temperate primary forest. *Biological Invasions* 17:1267–1281.
2. Choi, A. 2012. Invasive Earthworm (Oligochaeta: Lumbricidae) Populations in varying Vegetation Types on a Landscape-and Local-scale. Thesis, University of Toronto.
3. Corio, K., A. Wolf, M. Draney, and G. Fewless. 2009. Exotic earthworms of great lakes forests: A search for indicator plant species in maple forests. *Forest Ecology and Management* 258:1059–1066.
4. Eisenhauer, N., S. Partsch, D. Parkinson, and S. Scheu. 2007. Invasion of a deciduous forest by earthworms: changes in soil chemistry, microflora, microarthropods and vegetation. *Soil Biology and Biochemistry* 39:1099–1110.
5. Gibson, K. D., P. M. Quackenbush, N. C. Emery, M. A. Jenkins, and E. J. Kladivko. 2013. Invasive Earthworms and Plants in Indiana Old- and Second-Growth Forests. *Invasive Plant Science and Management* 6:161–174.
6. Hale, C. M., L. E. Frelich, and P. B. Reich. 2006. Changes in Hardwood Forest Understory Plant Communities in Response to European Earthworm Invasions. *Ecology* 87:1637–1649.
7. Hopfensperger, K. N., and S. Hamilton. 2015. Earthworm Communities in Previously Glaciated and Unglaciated Eastern Deciduous Forests. *Southeastern Naturalist* 14:66–84.
8. Hopfensperger, K. N., G. M. Leighton, and T. J. Fahey. 2011. Influence of Invasive Earthworms on Above and Belowground Vegetation in a Northern Hardwood Forest. *The American Midland Naturalist* 166:53–62.
9. Loss, S. R., R. M. Hueffmeier, C. M. Hale, G. E. Host, G. Sjerven, and L. E. Frelich. 2013. Earthworm Invasions in Northern Hardwood Forests: a Rapid Assessment Method. *Natural Areas Journal* 33:21–30.
10. Nuzzo, V. A., J. C. Maerz, and B. Blossey. 2009. Earthworm invasion as the driving force behind plant invasion and community change in northeastern North American forests. *Conservation Biology* 23:966–974.
11. Ojanen, P. T. 2014. A study of herbaceous vegetation in Chequamegon - Nicolet National Forest: relationship of earthworms, white-tailed deer browsing and *Carex pensylvanica* Lam. University of Minnesota.
12. Scharenbroch, B. C., B. Nix, K. A. Jacobs, and M. L. Bowles. 2012. Two decades of low-severity prescribed fire increases soil nutrient availability in a Midwestern, USA oak (*Quercus*) forest. *Geoderma* 183–184:80 – 91.

13. Straube, D., E. A. Johnson, D. Parkinson, S. Scheu, and N. Eisenhauer. 2009. Nonlinearity of effects of invasive ecosystem engineers on abiotic soil properties and soil biota. *Oikos* 118:885–896.
14. Umek L. and L. Heneghan, unpublished data.

**Appendix S3. Metadata of “Cravenetal\_EffectSizes\_Earthworms\_PlantDiversity.csv”**

**Study.** Unique identifier for each study, corresponding 'Study Name' in SI Table 1.

**Site.** Unique identifier for each site within each study.

**Plot\_N.** Number of locations per site per study where measures of both plant and non-native earthworm communities were taken.

**Plant Diversity Measure.** Identifier of measure used to assess species diversity of plant communities: 'SppNum' is species number, 'SppDiv' is Shannon-Weiner diversity, 'SppEven' is species evenness (Evar ; Smith & Wilson 1996), and 'Total\_Cover' is total plant cover, i.e. the sum of plant cover per species.

**Non-native Earthworm Community Measure.** Identifier of measure used to assess non-native earthworm communities: 'Biomass' is total biomass of non-native earthworms, 'Density' is total density of non-native earthworms, and 'EEG\_Richness' is earthworm ecological groups richness of non-native earthworms, i.e. the number of earthworm ecological groups (epigeic, endogeic, and anecic).

**Z-score.** Value of Fisher's z transformation of  $r$  (Pearson's correlation) for used for analysis to normalize the distribution of data. Each value represents the magnitude and direction of the correlation between the corresponding measure of plant and non-native earthworm communities.

**Variance.** Variance is an unbiased estimate of sampling variance (Hedges 1989) calculated using a large sample approximation.

**File Name:** “Cravenetal\_EffectSizes\_Earthworms\_PlantDiversity.csv”

**Appendix S4. Metadata of “Cravenetal\_EffectSizes\_Earthworms\_PlantFunctGroups.csv”**

**Study.** Unique identifier for each study, corresponding 'Study Name' in SI Table 1.

**Site.** Unique identifier for each site within each study.

**Plot\_N.** Number of locations per site per study where measures of both plant and non-native earthworm communities were taken.

**Plant Functional Group or Native Status.** Identifier of plant functional group or native /non-native status: “Forb\_herb” are herbaceous plants that are not graminoids, “Graminoid” are grasses or sedges, and “Woody” are plant species that produce wood (e.g., trees, shrubs, or vines), 'Native' are species classified as native to North America, and 'Introduced' are plant species classified as non-native to North America (USDA Plants Database).

**Non-native Earthworm Community Measure.** Measure of non-native earthworm communities: 'Biomass' is total biomass of non-native earthworms, 'Density' is total density of non-native earthworms, and 'EEG\_Richness' is earthworm ecological groups richness of non-native earthworms, i.e. the number of earthworm ecological groups (epigeic, endogeic, and anecic) present in a given plot.

**Z-score.** Value of Fisher's  $z$  transformation of  $r$  (Pearson's correlation) for used for analysis to normalize the distribution of data. Each value represents the magnitude and direction of the correlation between the corresponding measure of plant and non-native earthworm communities.

**Variance.** Variance is an unbiased estimate of sampling variance (Hedges 1989) calculated using a large sample approximation.

**File Name:** “Cravenetal\_EffectSizes\_Earthworms\_PlantFunctGroups.csv”

**Table S1.** Studies included in meta-analysis and information about publication type, the data used, earthworm extraction technique, earthworm plot location (relative to vegetation plots), earthworm community descriptors, plant community descriptions, the number of plots, study years, and study location.

| Study           | Publication type | Data      | Earthworm extraction method   | Earthworm plot location | Earthworm variables            | Earthworm Sampling (#/year) | Plant Variables                         | Plots (#) | Years       | Location                     |
|-----------------|------------------|-----------|-------------------------------|-------------------------|--------------------------------|-----------------------------|-----------------------------------------|-----------|-------------|------------------------------|
| Beausejour      | Article          | Raw       | Liquid mustard                | Nested                  | Biomass, EEG Richness          | 1                           | Diversity, PFG Abundance, Native Status | 85        | 2011        | Quebec, Canada               |
| Choi            | Thesis           | Raw       | Liquid mustard                | Nested                  | Biomass, Density, EEG Richness | 1                           | Diversity                               | 16        | 2011        | Ontario, Canada              |
| Corio           | Article          | Extracted | Liquid mustard                | Adjacent                | Biomass                        | 1                           | Diversity                               | 60        | 2005        | Wisconsin, USA               |
| Eisenhauer      | Article          | Raw       | Hand-sorting, Formalin        | Nested                  | Biomass, Density, EEG Richness | 1                           | Diversity, PFG Abundance, Native Status | 30        | 2004        | Alberta, Canada              |
| Gibson          | Article          | Raw       | Hand-sorting, Liquid mustard  | Nested                  | Density, EEG Richness          | 2                           | Diversity, PFG Abundance, Native Status | 24        | 2010        | Indiana, USA                 |
| Hale            | Article          | Extracted | Liquid mustard                | Nested                  | Biomass                        | 1                           | Diversity                               | 180       | 1998 – 2001 | Minnesota, USA               |
| Hopfensperger A | Article          | Raw       | Formalin                      | Adjacent                | Density, EEG Richness          | 1                           | Diversity, PFG Abundance, Native Status | 10        | 2001 – 2008 | New York, USA                |
| Hopfensperger B | Article          | Raw       | Liquid mustard                | Nested                  | Density, EEG Richness          | 1                           | Diversity, PFG Abundance, Native Status | 72        | 2011        | Ohio & Kentucky, USA         |
| Loss            | Article          | Raw       | Liquid mustard                | Nested                  | Biomass, Density, EEG Richness | 1                           | PFG Abundance                           | 270       | 2009 – 2010 | Minnesota & Wisconsin, USA   |
| Nuzzo           | Article          | Raw       | Coverboards                   | Adjacent                | Biomass, EEG Richness          | 8 – 14                      | Diversity, PFG Abundance, Native Status | 437       | 2000 – 2002 | New York & Pennsylvania, USA |
| Ojanen          | Thesis           | Raw       | Liquid mustard, Midden counts | Nested                  | EEG Richness                   | 1                           | Diversity, PFG Abundance, Native Status | 61        | 2009 – 2010 | Wisconsin, USA               |
| Scharenbroch    | Article          | Raw       | Hand-sorting, Liquid mustard  | Nested                  | Biomass, Density, EEG Richness | 1                           | Diversity, PFG Abundance, Native Status | 40        | 2008        | Illinois, USA                |

| <b>Study</b> | <b>Publication type</b> | <b>Data</b> | <b>Earthworm extraction method</b> | <b>Earthworm plot location</b> | <b>Earthworm variables</b>     | <b>Earthworm Sampling (#/year)</b> | <b>Plant Variables</b>                  | <b>Plots (#)</b> | <b>Years</b> | <b>Location</b> |
|--------------|-------------------------|-------------|------------------------------------|--------------------------------|--------------------------------|------------------------------------|-----------------------------------------|------------------|--------------|-----------------|
| Straube      | Article                 | Raw         | Hand-sorting, Formalin             | Nested                         | Biomass, Density, EEG Richness | 1                                  | Diversity, PFG Abundance, Native Status | 30               | 2007         | Alberta, Canada |
| Umek         | Thesis                  | Raw         | Liquid mustard                     | Nested                         | Biomass, Density, EEG Richness | 1                                  | Diversity, PFG Abundance                | 29               | 2009 – 2010  | Illinois, USA   |

Diversity of plant communities was quantified using the following measures: species richness, Shannon-Weiner diversity, and evenness (Evar; Smith and Wilson 1996). EEG Richness is the earthworm ecological group richness. PFG abundance is plant functional group abundance of grasses, woody, and herbaceous plant species; and native status is the abundance of native or non-native plants.

**Table S2.** Introduced earthworm species and their corresponding ecological groups used in the present study

| <b>Genus</b>        | <b>Species</b>     | <b>Life Stage</b> | <b>Earthworm Ecological Group</b> |
|---------------------|--------------------|-------------------|-----------------------------------|
| <i>Allobophora</i>  | <i>spp.</i>        | Adult             | endogeic                          |
| <i>Allobophora</i>  | <i>spp.</i>        | Juvenile          | -                                 |
| <i>Aporrectodea</i> | <i>calignosa</i>   | Adult             | endogeic                          |
| <i>Aporrectodea</i> | <i>calignosa</i>   | Juvenile          | -                                 |
| <i>Aporrectodea</i> | <i>chlorotica</i>  | Adult             | endogeic                          |
| <i>Aporrectodea</i> | <i>chlorotica</i>  | Juvenile          | -                                 |
| <i>Aporrectodea</i> | <i>longa</i>       | Adult             | anecic                            |
| <i>Aporrectodea</i> | <i>longa</i>       | Juvenile          | -                                 |
| <i>Aporrectodea</i> | <i>rosea</i>       | Adult             | endogeic                          |
| <i>Aporrectodea</i> | <i>rosea</i>       | Juvenile          | -                                 |
| <i>Aporrectodea</i> | <i>spp.</i>        | Adult             | endogeic                          |
| <i>Aporrectodea</i> | <i>spp.</i>        | Juvenile          | -                                 |
| <i>Aporrectodea</i> | <i>trapezoides</i> | Adult             | endogeic                          |
| <i>Aporrectodea</i> | <i>trapezoides</i> | Juvenile          | -                                 |
| <i>Aporrectodea</i> | <i>tuberculata</i> | Adult             | endogeic                          |
| <i>Aporrectodea</i> | <i>tuberculata</i> | Juvenile          | -                                 |
| <i>Aporrectodea</i> | <i>turgida</i>     | Adult             | endogeic                          |
| <i>Aporrectodea</i> | <i>turgida</i>     | Juvenile          | -                                 |
| <i>Dendrobaena</i>  | <i>octaedra</i>    | Adult             | epigeic                           |
| <i>Dendrobaena</i>  | <i>octaedra</i>    | Juvenile          | -                                 |
| <i>Dendrobaena</i>  | <i>rubida</i>      | Adult             | epigeic                           |
| <i>Dendrobaena</i>  | <i>rubida</i>      | Juvenile          | -                                 |
| <i>Dendrodrilus</i> | <i>rubidus</i>     | Adult             | epigeic                           |
| <i>Dendrodrilus</i> | <i>rubidus</i>     | Juvenile          | -                                 |
| <i>Eiseniella</i>   | <i>tetraedra</i>   | Adult             | epigeic                           |
| <i>Eiseniella</i>   | <i>tetraedra</i>   | Juvenile          | -                                 |
| <i>Lumbricus</i>    | <i>castaneus</i>   | Adult             | epigeic                           |
| <i>Lumbricus</i>    | <i>castaneus</i>   | Juvenile          | -                                 |
| <i>Lumbricus</i>    | <i>rubellus</i>    | Adult             | epigeic                           |
| <i>Lumbricus</i>    | <i>rubellus</i>    | Juvenile          | -                                 |
| <i>Lumbricus</i>    | <i>spp.</i>        | Adult             | -                                 |
| <i>Lumbricus</i>    | <i>spp.</i>        | Juvenile          | epigeic                           |
| <i>Lumbricus</i>    | <i>terrestris</i>  | Adult             | anecic                            |
| <i>Lumbricus</i>    | <i>terrestris</i>  | Juvenile          | -                                 |
| <i>Octolasion</i>   | <i>spp.</i>        | Adult             | -                                 |
| <i>Octolasion</i>   | <i>spp.</i>        | Juvenile          | endogeic                          |
| <i>Octolasion</i>   | <i>tyrtaeum</i>    | Adult             | endogeic                          |
| <i>Octolasion</i>   | <i>tyrtaeum</i>    | Juvenile          | -                                 |

Sims and Gerard (1985) and Coleman and Crossley Jr (2004) were consulted to determine earthworm ecological groups for earthworm species.



**Table S2 (continued)****References**

- Sims, R. W., and B. M. Gerard. 1985. Earthworms: keys and notes for the identification and study of the species. Brill Archive.
- Coleman, D. C., and D. A. Crossley Jr. 2004. Fundamentals of soil ecology. Academic press.

**Table S3.** Summary of meta-analytic mixed-effects models testing the relationships between introduced earthworm biomass, density, and ecological group richness in forest understory communities in North America.

| <b>Response variable</b>                            | <b>Study</b> | <b>Observations</b> | <b>AICc</b> | <b>Residual heterogeneity</b> | <b>L</b>           |
|-----------------------------------------------------|--------------|---------------------|-------------|-------------------------------|--------------------|
| <i>Combinations of earthworm community measures</i> | 11           | 79                  | 130.47      | <b><i>714.1</i></b>           | <b><i>25.4</i></b> |

Meta-analytic mixed-effects models evaluated the direction and strength of size effects representing the association between unique combinations of measures of introduced earthworm community abundance or structure (density, biomass, earthworm ecological group richness). Residual heterogeneity shows if the variability of the effect sizes not captured by the moderator variables is heterogeneous. The moderator variables in all models were measures of introduced earthworm communities. L is the likelihood ratio test statistic for model coefficients. Values of residual heterogeneity and L in black italics indicate statistical significance ( $\alpha = 0.05$ ). Please see Figure A1 for mean effect sizes.

**Table S4.** Summary of meta-analytic mixed-effects models testing the relationships between introduced earthworm biomass, density, and ecological group richness and total plant cover in forest understory communities in North America.

| <b>Response variable</b> | <b>Study</b> | <b>Observations</b> | <b>AICc</b> | <b>Residual heterogeneity</b> | <b>L</b> |
|--------------------------|--------------|---------------------|-------------|-------------------------------|----------|
| <i>Total plant cover</i> | 10           | 75                  | 38.94       | <b><i>119.3</i></b>           | 1.3      |

Meta-analytic mixed-effects models evaluated the direction and strength of size effects representing the association between a measure of introduced earthworm community abundance or structure (density, biomass, earthworm ecological group richness) and total plant cover (%). Residual heterogeneity shows if the variability of the effect sizes not captured by the moderator variables is heterogeneous. The moderator variables in all models were measures of introduced earthworm communities. L is the likelihood ratio test statistic for model coefficients. Values of residual heterogeneity and L in black italics indicate statistical significance ( $\alpha = 0.05$ ). Please see Figure A2 for mean effect sizes.

**Figure S1.** Frequency of earthworm ecological group richness across all studies and correlations among measures of introduced earthworm abundance in North American forests.

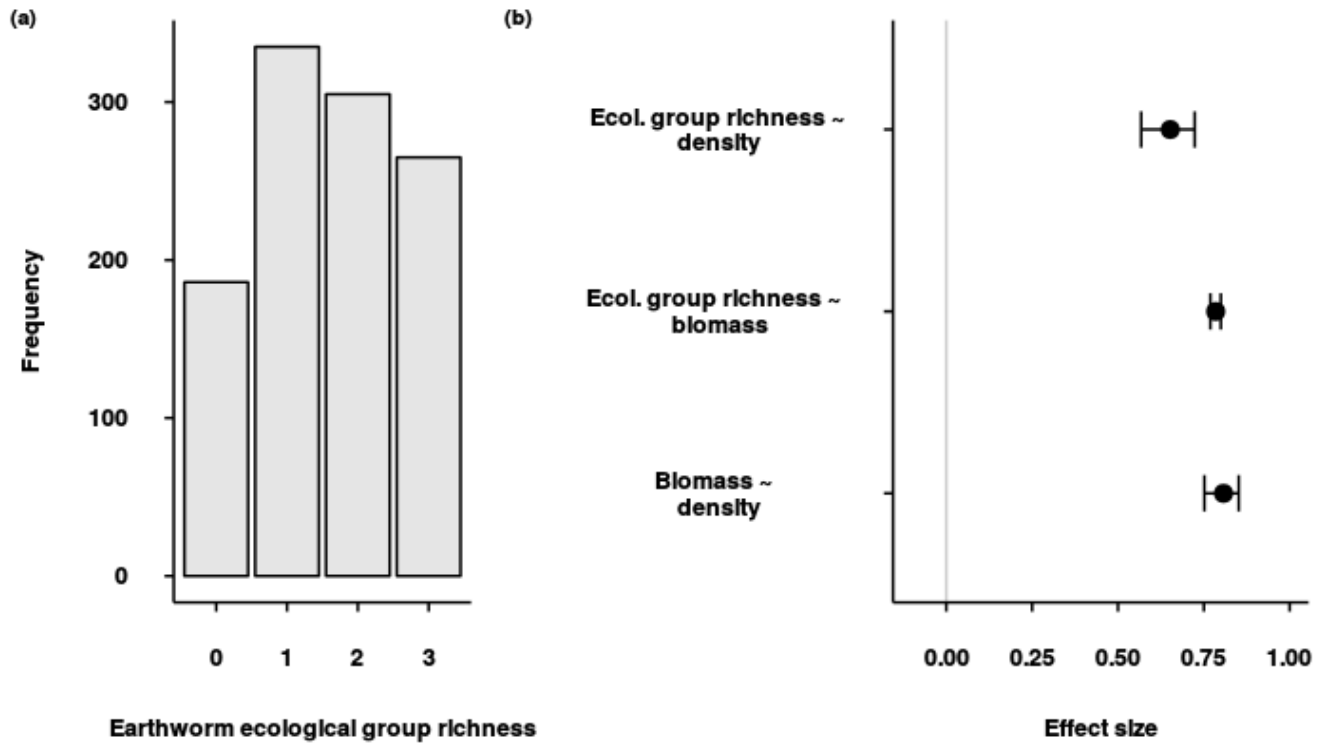

Meta-analytic mixed-effects model was used to evaluate the direction and strength of size effects representing the association between measures of introduced earthworm community abundance. Whisker bars are 95% confidence intervals. Effect sizes are Pearson's correlation coefficient and Fisher's r-to-z transformed coefficient was used for analysis. Earthworm biomass is biomass of non-native earthworms, earthworm density is number of introduced earthworms, and earthworm ecological group richness is the number of introduced earthworm ecological groups.

**Figure S2.** Effect sizes of relationships between introduced earthworm communities and total plant cover of forest understory communities in North America.

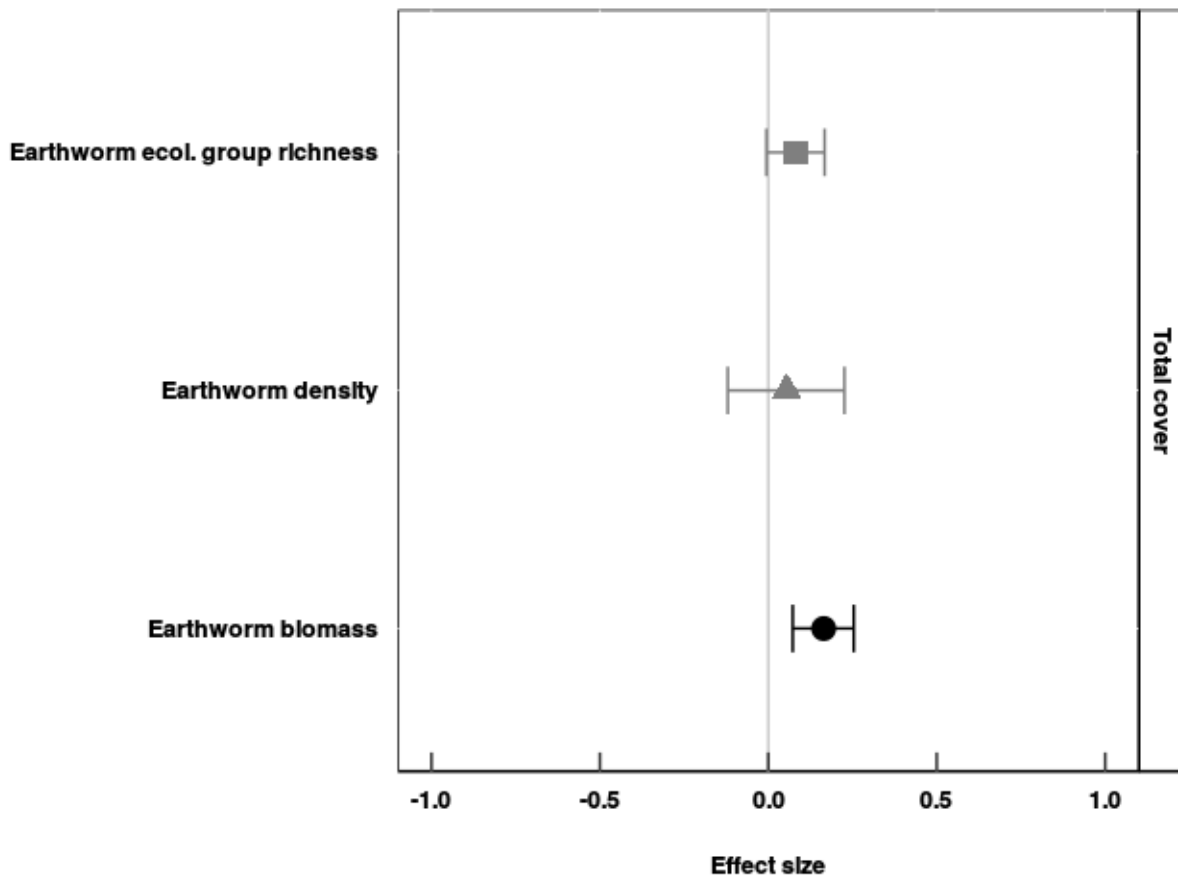

Meta-analytic mixed-effects models evaluated the direction and strength of size effects representing the association between a measure of introduced earthworm communities (density, biomass, earthworm ecological group richness) and total percent cover. Whisker bars are 95% confidence intervals. Effect sizes are Pearson's correlation coefficient and Fisher's  $r$ -to- $z$  transformed coefficient was used for analysis. Earthworm biomass is biomass of introduced earthworms, earthworm density is number of introduced earthworms, and earthworm ecological group richness is the number of introduced earthworm ecological groups.
